# Supplementary material for: A Near Infrared Spectroscopy (NIRS) and Chemometric Approach to Improve Apple Fruit Quality Management: A Case Study on the Cultivars “Cripps Pink” and “Braeburn”
Source: PubMed Central journal article supplement (PMC6331841; doi:10.3390/molecules200813603), 2015-08-24
Supplement: molecules-20-13603-s001.pdf [file molecules-20-13603-s001.pdf]

## Supplementary Material

**Table S1.** Post-harvest evolution of quality parameters (mean) of “Braeburn” and “Cripps Pink” apples from the harvest date 2 (HT2) during long-term CA storage.

| Variety                          | “Braeburn”          |                     |                     |                     |                   |                      | “Cripps Pink”       |                     |                      |                      |                     |                      |
|----------------------------------|---------------------|---------------------|---------------------|---------------------|-------------------|----------------------|---------------------|---------------------|----------------------|----------------------|---------------------|----------------------|
| analysis time-point              | 0                   | 7                   | 15                  | 21                  | 28                | 32                   | 0                   | 6                   | 15                   | 20                   | 27                  | 30                   |
| sample number                    | 30                  | 30                  | 29                  | 30                  | 29                | 30                   | 30                  | 30                  | 29                   | 30                   | 29                  | 29                   |
| weight [g] *                     | 209.5               | 205.8               | 211.8               | 195.4               | 201.2             | 204.2                | 211.1               | 214.0               | 207.8                | 214.3                | 213.0               | 203.9                |
| total juice [mL] *               |                     | 123.8 <sup>a</sup>  | 127.8 <sup>a</sup>  | 99.5 <sup>b,c</sup> | 94.2 <sup>c</sup> | 117.4 <sup>a,b</sup> |                     | 129.1 <sup>a</sup>  | 120.1 <sup>a,b</sup> | 107.2 <sup>b,c</sup> | 103.2 <sup>c</sup>  | 111.8 <sup>b,c</sup> |
| pH <sup>#</sup>                  | 3.54 <sup>a,b</sup> | 3.52 <sup>a</sup>   | 3.62 <sup>c</sup>   | 3.58 <sup>b</sup>   | 3.65 <sup>c</sup> |                      | 3.49 <sup>a</sup>   | 3.59 <sup>b</sup>   | 3.70 <sup>c</sup>    | 3.67 <sup>c</sup>    | 3.77 <sup>d</sup>   | 3.84 <sup>e</sup>    |
| TA [g/L malic acid] <sup>#</sup> | 5.3 <sup>a</sup>    | 5.2 <sup>a,b</sup>  | 4.8 <sup>b,c</sup>  | 4.7 <sup>b,c</sup>  | 4.4 <sup>c</sup>  |                      | 5.1 <sup>a</sup>    | 4.6 <sup>b</sup>    | 3.9 <sup>c</sup>     | 3.9 <sup>c</sup>     | 3.4 <sup>d</sup>    | 3.2 <sup>d</sup>     |
| TSS [°Brix] *                    | 9.9 <sup>a</sup>    | 12.4 <sup>b</sup>   | 12.1 <sup>b</sup>   | 12.1 <sup>b</sup>   | 12.7 <sup>b</sup> |                      | 13.3 <sup>a</sup>   | 11.9 <sup>c</sup>   | 12.8 <sup>a,b</sup>  | 12.2 <sup>b,c</sup>  | 13.2 <sup>a</sup>   | 12.9 <sup>a,b</sup>  |
| F <sub>f</sub> [N] *             | 86.7 <sup>a</sup>   | 82.6 <sup>a,b</sup> | 76.8 <sup>b,c</sup> | 71.5 <sup>c,d</sup> | 69.3 <sup>d</sup> | 72.1 <sup>c,d</sup>  | 105.0 <sup>a</sup>  | 93.2 <sup>b</sup>   | 84.5 <sup>c</sup>    | 83.9 <sup>c</sup>    | 81.6 <sup>c</sup>   |                      |
| D [mm] *                         | 3.55 <sup>a,b</sup> | 3.56 <sup>a,b</sup> | 3.33 <sup>a,b</sup> | 3.51 <sup>a,b</sup> | 3.25 <sup>a</sup> | 3.63 <sup>b</sup>    | 4.90 <sup>a,b</sup> | 4.60 <sup>b,c</sup> | 5.20 <sup>a</sup>    | 4.33 <sup>c</sup>    | 4.30 <sup>c</sup>   |                      |
| W <sub>f</sub> [J] *             | 0.18 <sup>a</sup>   | 0.16 <sup>a,b</sup> | 0.15 <sup>b,c</sup> | 0.15 <sup>b,c</sup> | 0.13 <sup>c</sup> | 0.16 <sup>a,b</sup>  | 0.29 <sup>a</sup>   | 0.25 <sup>b</sup>   | 0.22 <sup>b,c</sup>  | 0.21 <sup>c</sup>    | 0.20 <sup>c</sup>   |                      |
| F <sub>LC</sub> [N] *            | 63.2 <sup>a</sup>   | 60.4 <sup>a,b</sup> | 58.3 <sup>a,b</sup> | 54.9 <sup>b,c</sup> | 51.0 <sup>c</sup> | 55.2 <sup>b,c</sup>  | 92.2 <sup>a</sup>   | 77.0 <sup>b</sup>   | 66.3 <sup>c</sup>    | 63.2 <sup>c</sup>    | 57.5 <sup>d</sup>   |                      |
| S [N/mm] *                       | 39.6 <sup>a,b</sup> | 47.5 <sup>a</sup>   | 32.3 <sup>b</sup>   | 37.0 <sup>a,b</sup> | 47.7 <sup>a</sup> | 35.8 <sup>a,b</sup>  | 37.0 <sup>a</sup>   | 32.2 <sup>a,b</sup> | 55.6 <sup>c</sup>    | 28.1 <sup>b</sup>    | 31.0 <sup>a,b</sup> |                      |
| glucose [g/100 g] <sup>#</sup>   |                     | 0.8                 | 1.0                 | 1.1                 | 1.0               | 1.2                  |                     | 0.5                 | 0.6                  | 0.6                  | 0.6                 | 0.6                  |
| xylose [g/100 g] *               |                     | 0.03 <sup>a</sup>   | 0.04 <sup>a,b</sup> | 0.05 <sup>b</sup>   | 0.06 <sup>b</sup> | 0.05 <sup>b</sup>    |                     | 0.04 <sup>a</sup>   | 0.05 <sup>a,b</sup>  | 0.06 <sup>b</sup>    | 0.06 <sup>b</sup>   | 0.06 <sup>b</sup>    |
| sucrose [g/100 g] <sup>#</sup>   |                     | 2.0                 | 1.8                 | 1.6                 | 1.4               | 1.4                  |                     | 3.6 <sup>a</sup>    | 3.2 <sup>a,b</sup>   | 3.2 <sup>a,b</sup>   | 2.6 <sup>b,c</sup>  | 2.4 <sup>c</sup>     |
| fructose [g/100 g] *             |                     | 3.4                 | 3.5                 | 3.5                 | 3.2               | 2.6                  |                     | 3.0                 | 3.1                  | 2.8                  | 2.8                 | 2.8                  |

Means with different superscript letters in the same row differ significantly ( $p < 0.05$ ) within one cultivar; \* ANOVA followed by the Tukey test; # Kruskal-Wallis test followed by the Mann-Whitney  $U$  test with Bonferroni correction.

**Table S2.** Post-harvest evolution of quality parameters (mean) of “Braeburn” and “Cripps Pink” apples from the harvest date 3 (HT3) during long-term CA storage.

| Variety                          | “Braeburn”          |                     |                       |                      |                     |                      | “Cripps Pink”     |                      |                     |                      |                     |                    |
|----------------------------------|---------------------|---------------------|-----------------------|----------------------|---------------------|----------------------|-------------------|----------------------|---------------------|----------------------|---------------------|--------------------|
| analysis time-point              | 0                   | 7                   | 15                    | 21                   | 28                  | 32                   | 0                 | 6                    | 15                  | 20                   | 27                  | 30                 |
| sample number                    | 30                  | 28                  | 28                    | 29                   | 27                  | 29                   | 30                | 30                   | 30                  | 30                   | 30                  | 29                 |
| weight [g] *                     | 208.8               | 214.3               | 220.9                 | 218.9                | 214.2               | 213.2                | 215.4             | 220.4                | 220.9               | 215.8                | 205.7               | 202.7              |
| total juice [mL] *               |                     | 127.1 <sup>a</sup>  | 130.7 <sup>a</sup>    | 115.6 <sup>a,b</sup> | 101.4 <sup>b</sup>  | 121.5 <sup>a,b</sup> |                   | 128.1 <sup>a</sup>   | 130.6 <sup>a</sup>  | 115.7 <sup>a,b</sup> | 104.3 <sup>b</sup>  | 111.7 <sup>b</sup> |
| pH <sup>#</sup>                  | 3.58 <sup>a</sup>   | 3.62 <sup>a,b</sup> | 3.65 <sup>b,c</sup>   | 3.62 <sup>a,b</sup>  | 3.69 <sup>c</sup>   | 3.81 <sup>d</sup>    | 3.49 <sup>a</sup> | 3.56 <sup>b</sup>    | 3.67 <sup>c</sup>   | 3.66 <sup>c</sup>    | 3.82 <sup>d</sup>   | 3.85 <sup>d</sup>  |
| TA [g/L malic acid] <sup>#</sup> | 4.6 <sup>a</sup>    | 4.8 <sup>a</sup>    | 4.5 <sup>a</sup>      | 4.5 <sup>a,b</sup>   | 4.1 <sup>b</sup>    | 3.4 <sup>c</sup>     | 5.4 <sup>a</sup>  | 4.8 <sup>b</sup>     | 4.2 <sup>c</sup>    | 4.0 <sup>c</sup>     | 3.3 <sup>d</sup>    | 3.3 <sup>d</sup>   |
| TSS [°Brix] *                    | 12.2                | 13.2                | 12.3                  | 12.7                 | 13.0                | 12.9                 | 13.2 <sup>a</sup> | 12.6 <sup>b</sup>    | 13.1 <sup>a,b</sup> | 12.9 <sup>a,b</sup>  | 13.0 <sup>a,b</sup> | 12.6 <sup>b</sup>  |
| F <sub>f</sub> [N] *             | 87.2 <sup>a</sup>   | 79.6 <sup>a,b</sup> | 79.0 <sup>b</sup>     | 72.6 <sup>b,c</sup>  | 67.5 <sup>c</sup>   | 65.0 <sup>c</sup>    | 94.4 <sup>a</sup> | 92.9 <sup>a</sup>    | 85.6 <sup>b</sup>   | 79.7 <sup>b,c</sup>  | 74.1 <sup>c</sup>   |                    |
| D [mm] *                         | 3.68 <sup>a,b</sup> | 3.75 <sup>a</sup>   | 3.39 <sup>a,b</sup>   | 3.40 <sup>a,b</sup>  | 3.27 <sup>b</sup>   | 3.54 <sup>a,b</sup>  | 5.01 <sup>a</sup> | 4.99 <sup>a</sup>    | 6.22 <sup>b</sup>   | 4.74 <sup>a</sup>    | 4.51 <sup>a</sup>   |                    |
| W <sub>f</sub> [J] *             | 0.18 <sup>a</sup>   | 0.17 <sup>a,b</sup> | 0.16 <sup>a,b,c</sup> | 0.15 <sup>b,c</sup>  | 0.13 <sup>c</sup>   | 0.14 <sup>b,c</sup>  | 0.28 <sup>a</sup> | 0.28 <sup>a</sup>    | 0.28 <sup>a</sup>   | 0.23 <sup>b</sup>    | 0.20 <sup>b</sup>   |                    |
| F <sub>LC</sub> [N] *            | 63.8 <sup>a</sup>   | 60.8 <sup>a</sup>   | 58.9 <sup>a,b</sup>   | 53.5 <sup>b,c</sup>  | 52.3 <sup>b,c</sup> | 52.0 <sup>c</sup>    | 84.2 <sup>a</sup> | 82.7 <sup>a,b</sup>  | 76.1 <sup>b,c</sup> | 70.4 <sup>c</sup>    | 62.2 <sup>d</sup>   |                    |
| S [N/mm] *                       | 33.5 <sup>a</sup>   | 44.6 <sup>b</sup>   | 32.3 <sup>a</sup>     | 35.0 <sup>a</sup>    | 54.4 <sup>b</sup>   | 34.8 <sup>a</sup>    | 36.9              | 32.1                 | 30.9                | 31.2                 | 28.3                |                    |
| glucose [g/100 g] <sup>#</sup>   |                     | 0.8 <sup>a</sup>    | 1.0 <sup>a,b</sup>    | 1.0 <sup>a,b</sup>   | 1.0 <sup>a,b</sup>  | 1.3 <sup>b</sup>     |                   | 0.4 <sup>a</sup>     | 0.5 <sup>a</sup>    | 1.1 <sup>b</sup>     | 0.5 <sup>a</sup>    | 0.5 <sup>a</sup>   |
| xylose [g/100 g] *               |                     | 0.02 <sup>a</sup>   | 0.03 <sup>a,b</sup>   | 0.05 <sup>c</sup>    | 0.05 <sup>b,c</sup> | 0.03 <sup>a,b</sup>  |                   | 0.02 <sup>a</sup>    | 0.04 <sup>a,b</sup> | 0.06 <sup>b,c</sup>  | 0.05 <sup>b,c</sup> | 0.06 <sup>c</sup>  |
| sucrose [g/100 g] <sup>#</sup>   |                     | 2.1 <sup>a</sup>    | 1.6 <sup>a,b</sup>    | 1.9 <sup>a,b</sup>   | 1.2 <sup>b</sup>    | 3.3 <sup>c</sup>     |                   | 3.5 <sup>a</sup>     | 3.8 <sup>a</sup>    | 2.4 <sup>b</sup>     | 2.1 <sup>b</sup>    | 2.3 <sup>b</sup>   |
| fructose [g/100 g] *             |                     | 3.0 <sup>a</sup>    | 3.0 <sup>a</sup>      | 3.0 <sup>a</sup>     | 2.9 <sup>a</sup>    | 1.3 <sup>b</sup>     |                   | 2.7 <sup>a,b,c</sup> | 3.1 <sup>b,c</sup>  | 3.3 <sup>c</sup>     | 2.2 <sup>a</sup>    | 2.5 <sup>a,b</sup> |

Means with different superscript letters in the same row differ significantly ( $p < 0.05$ ) within one cultivar; \* ANOVA followed by the Tukey test; # Kruskal-Wallis test followed by the Mann-Whitney  $U$  test with Bonferroni correction.

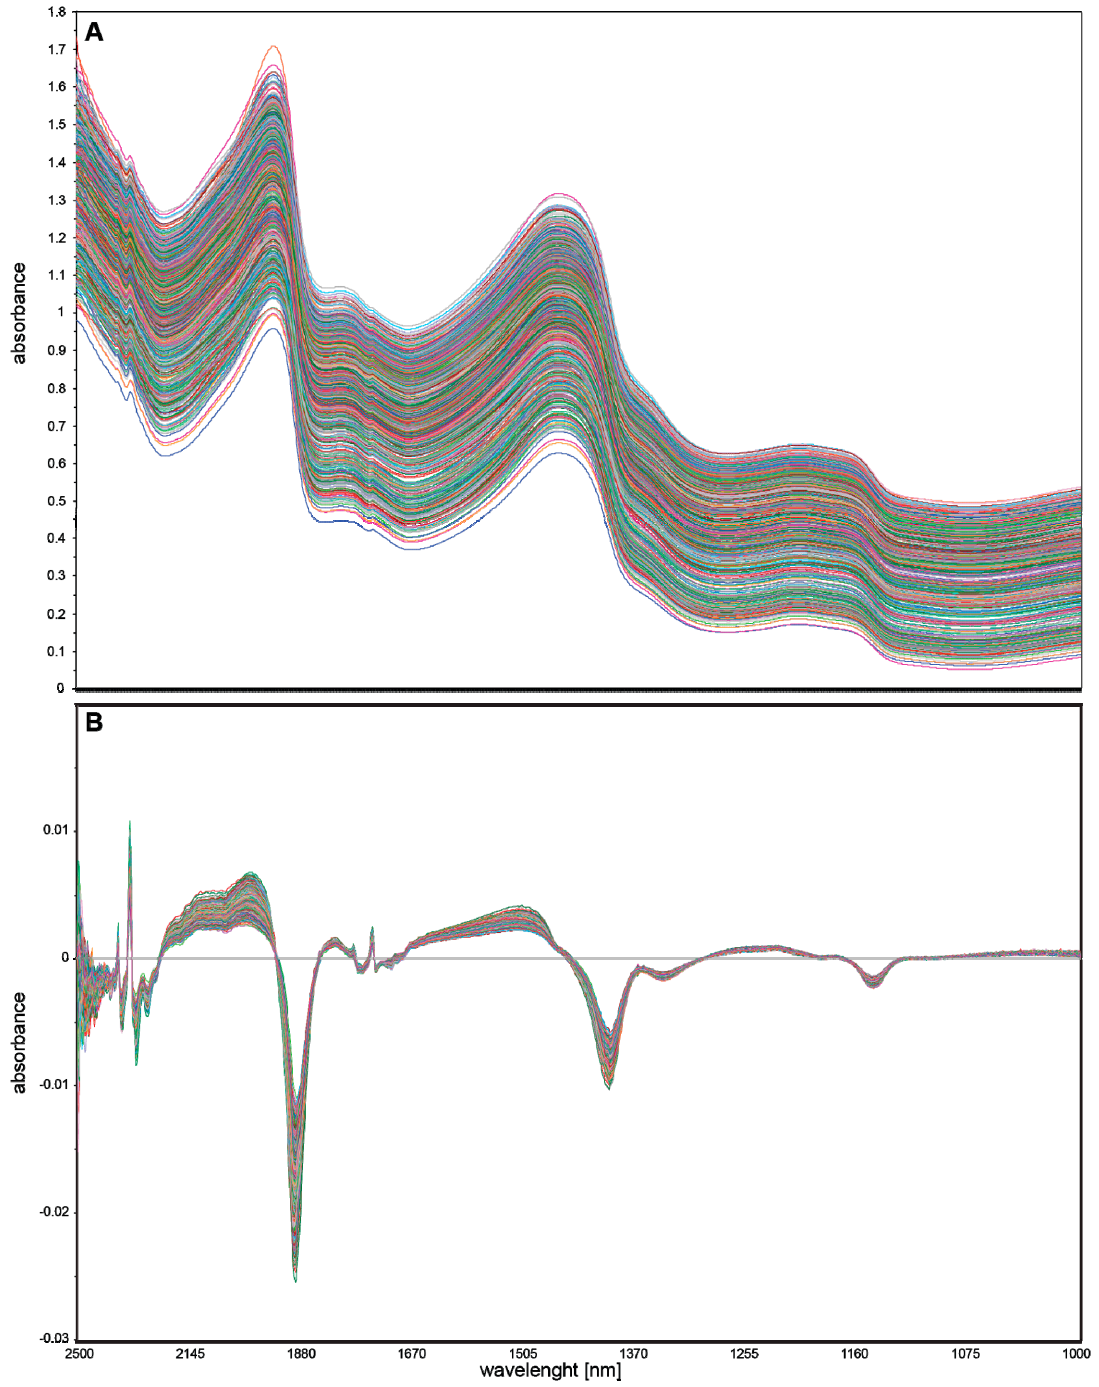

**Figure S1.** Raw NIR spectra (A) and spectra pretreated by de-trending and first derivative Savitzky-Golay (B) for 1049 apples.

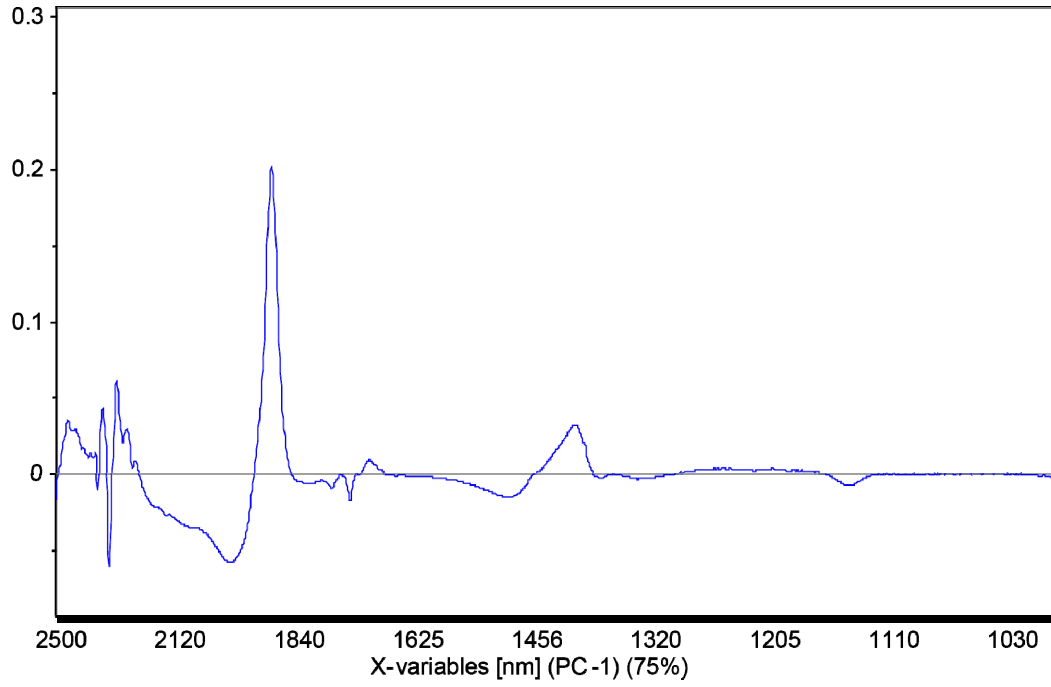

**Figure S2.** PCA loadings plot of NIR data acquired from the complete data set (515 “Braeburn” and 534 “Cripps Pink” apples).
